# Supplementary material for: Investigation of hydrogen bonding patterns in a series of multi-component molecular solids formed by tetrabromoterephthalic acid with selected N-heterocycles
Source: Royal Society of Chemistry journal article supplement (doi:10.1039/c4ra08452g), 2014-01-01
Supplement: c4ra08452g1.pdf [file c4ra08452g1.pdf]

## Supporting information for this article:

Synthons XIV–XXXI about this work

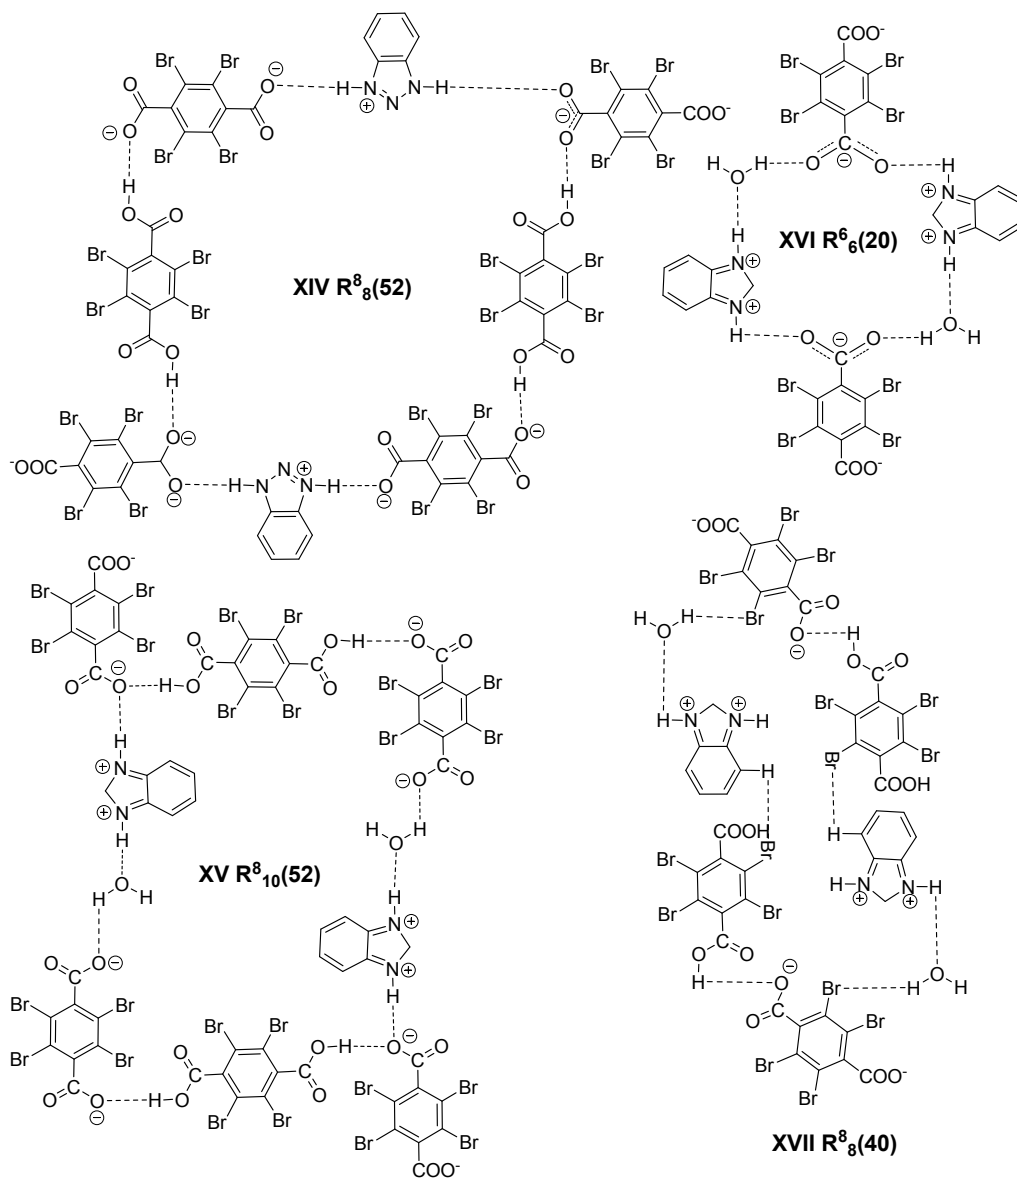

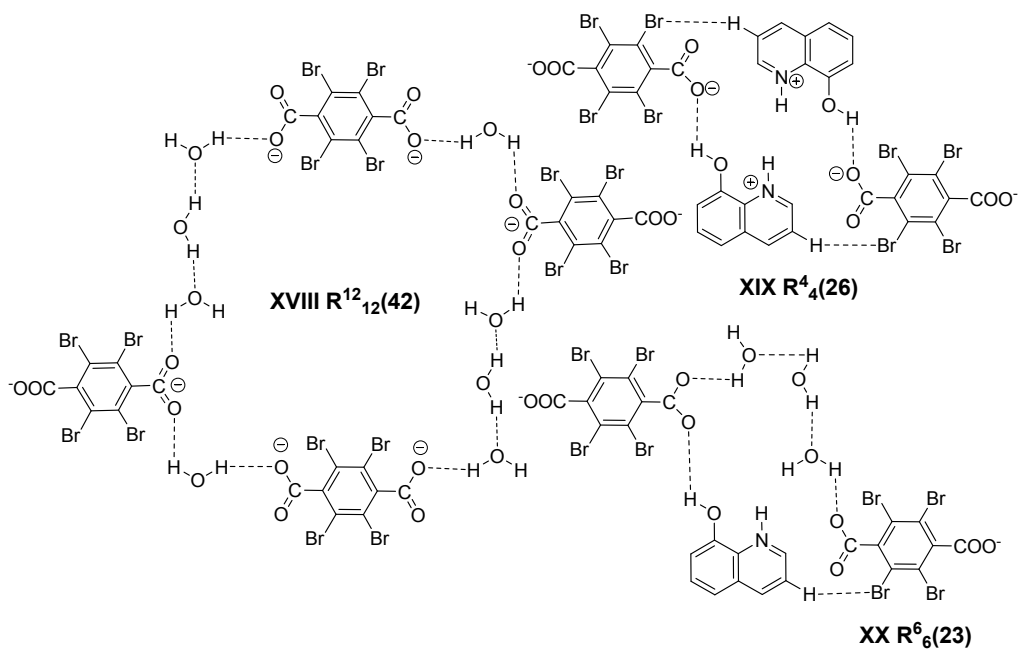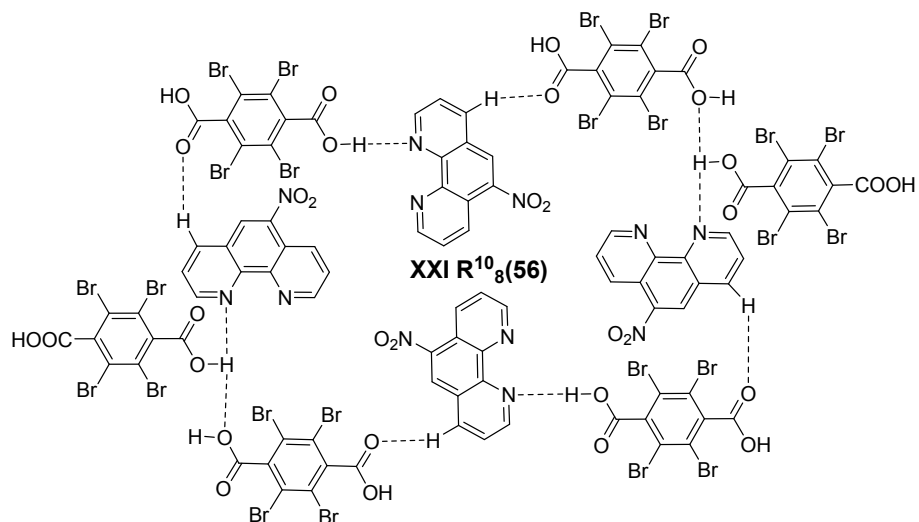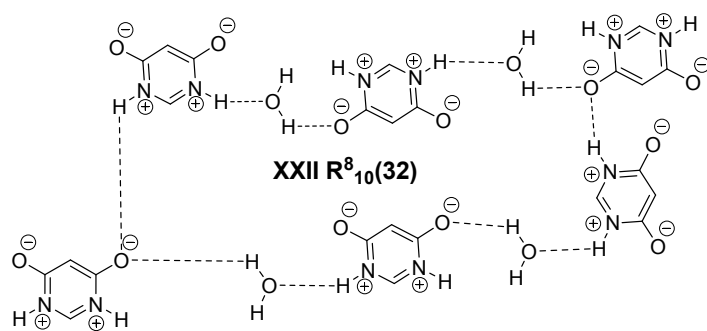

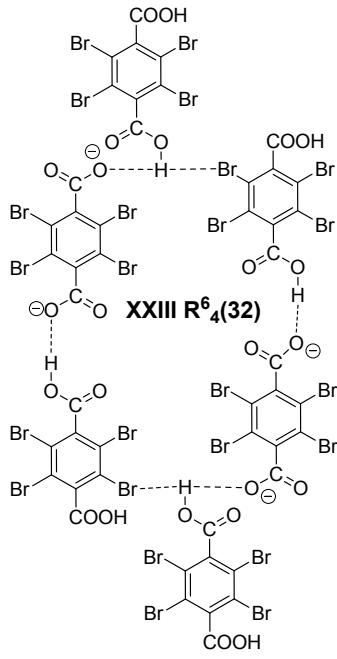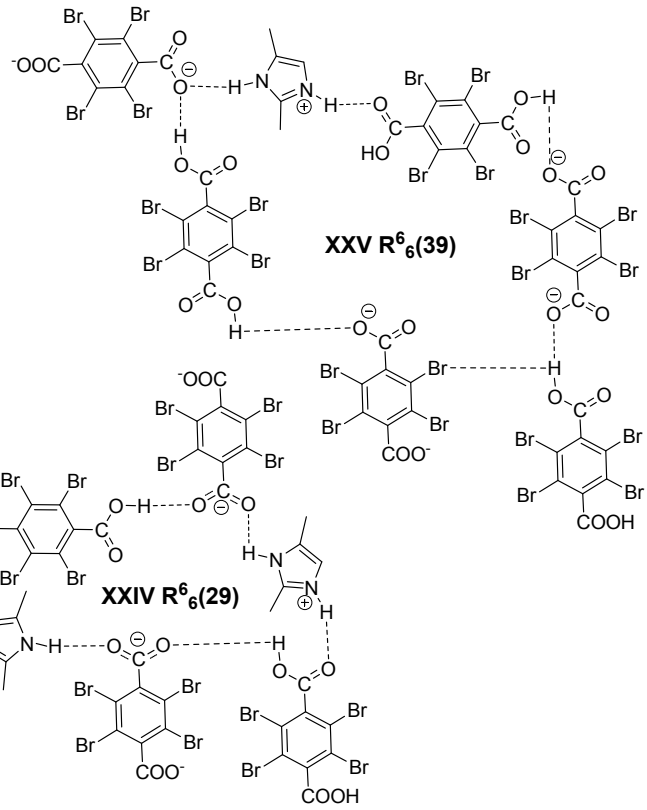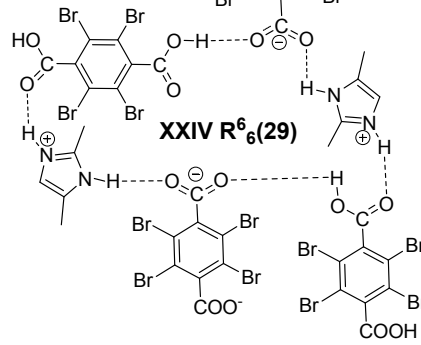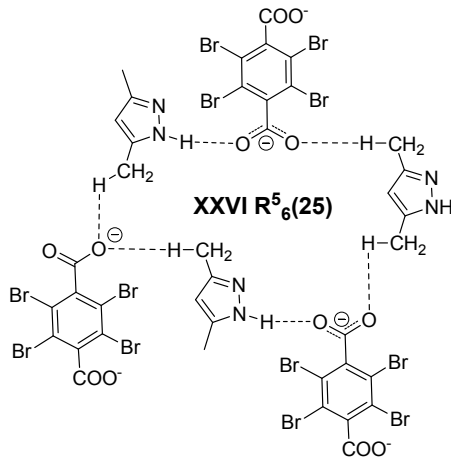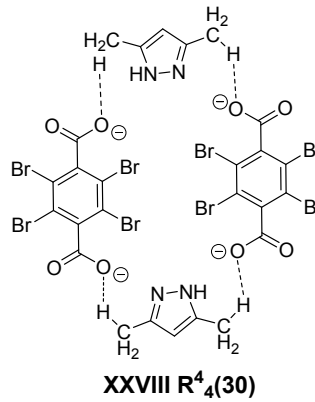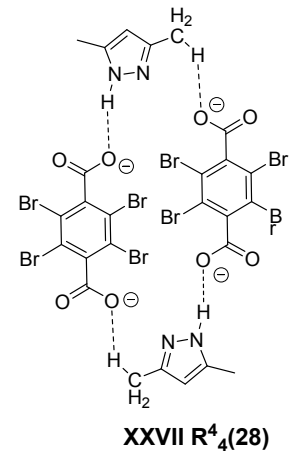

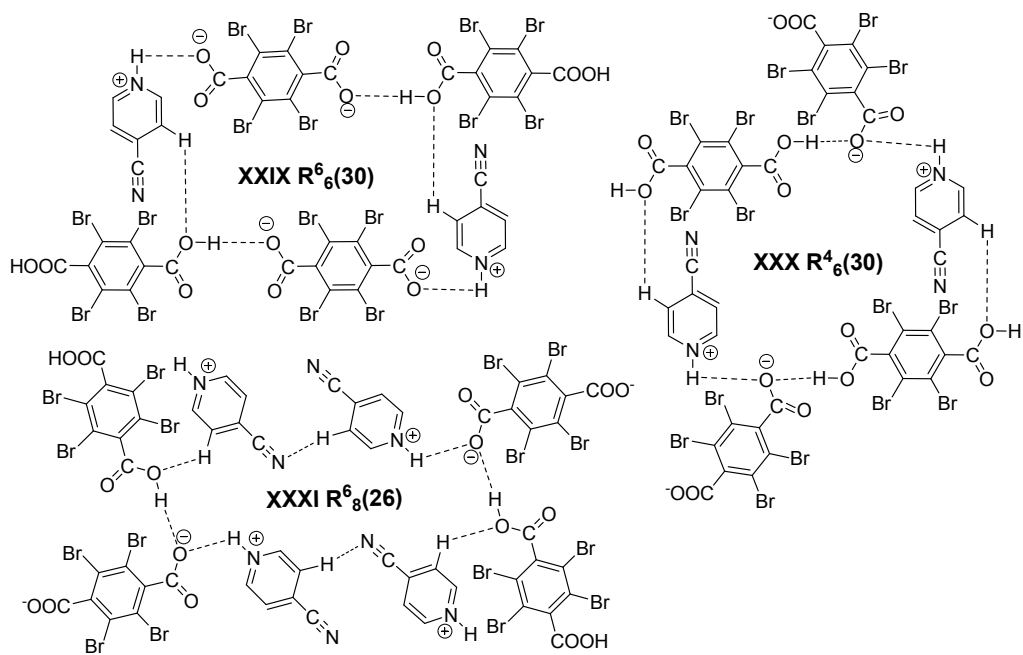

IR curves

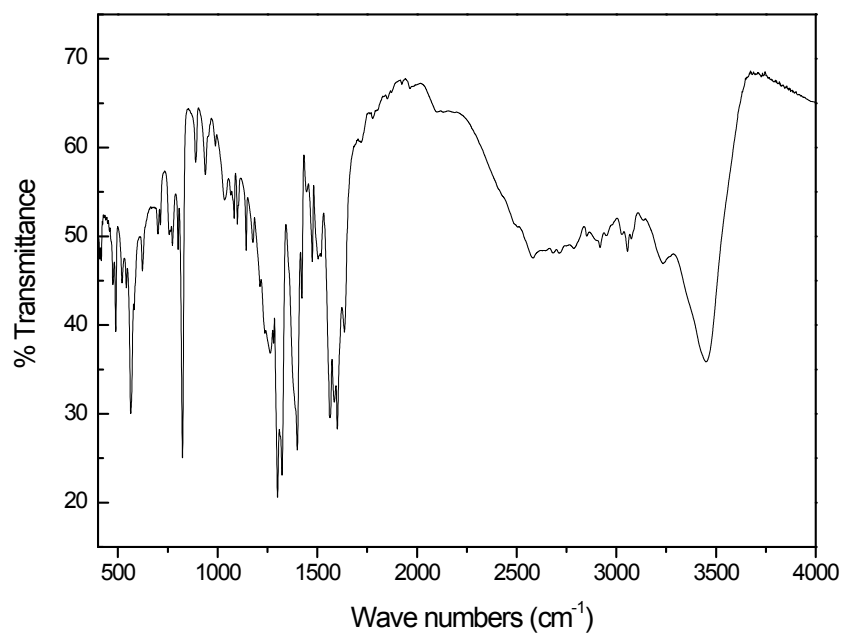

The IR curve of 1

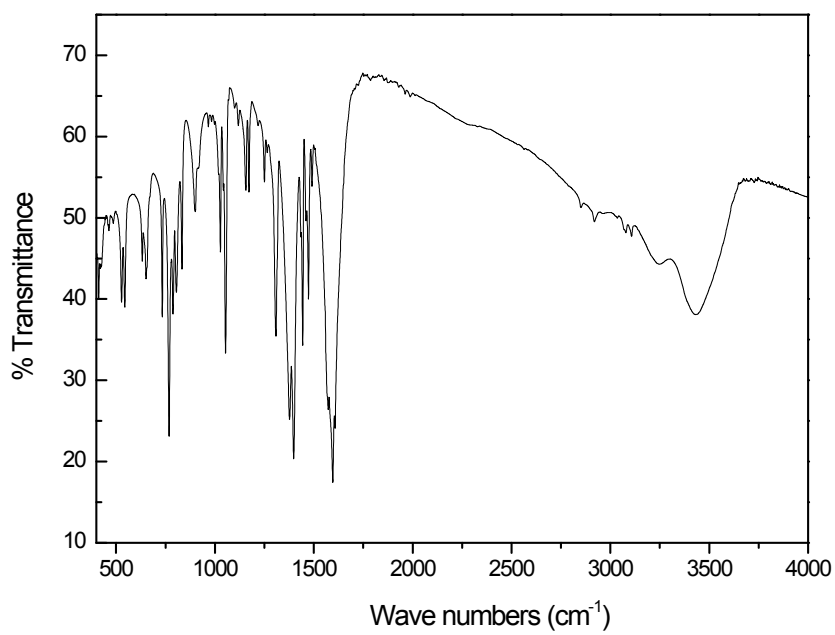

The IR curve of **2**

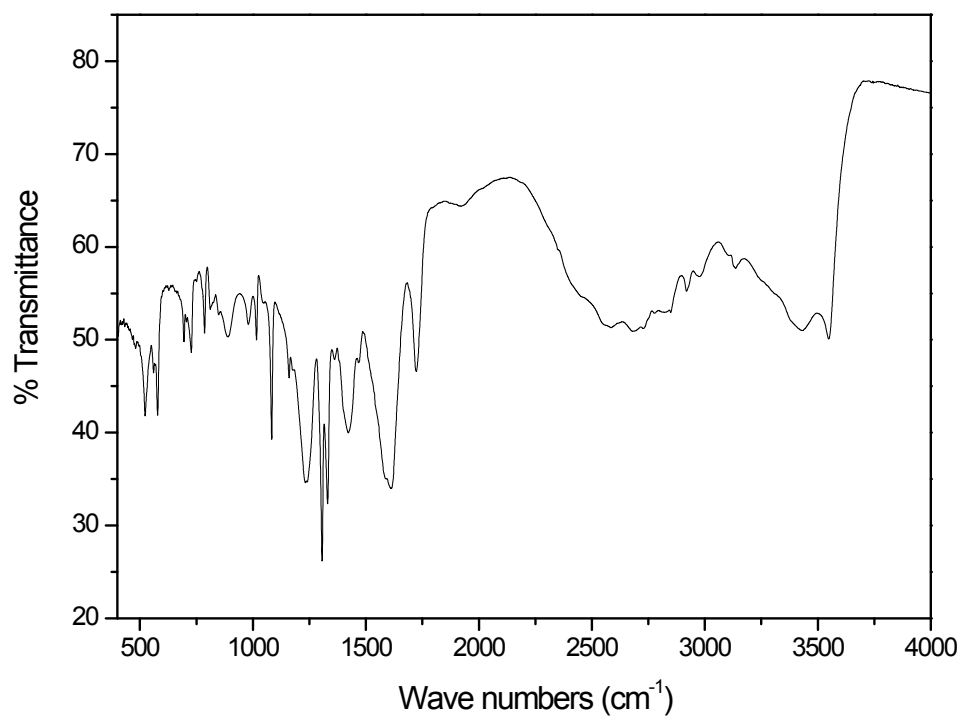

The IR curve of **3**

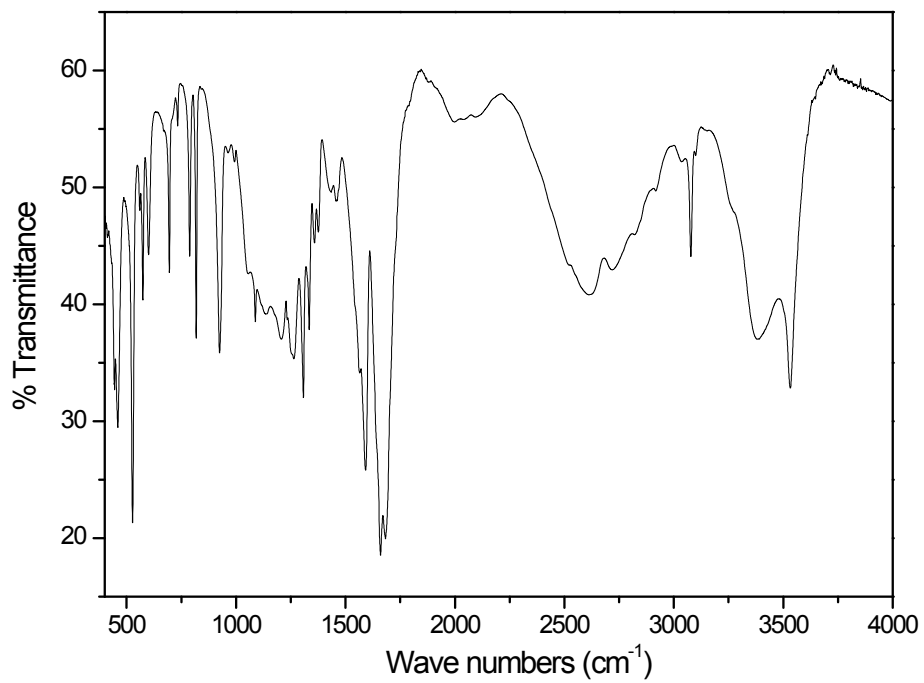

The IR curve of **4**

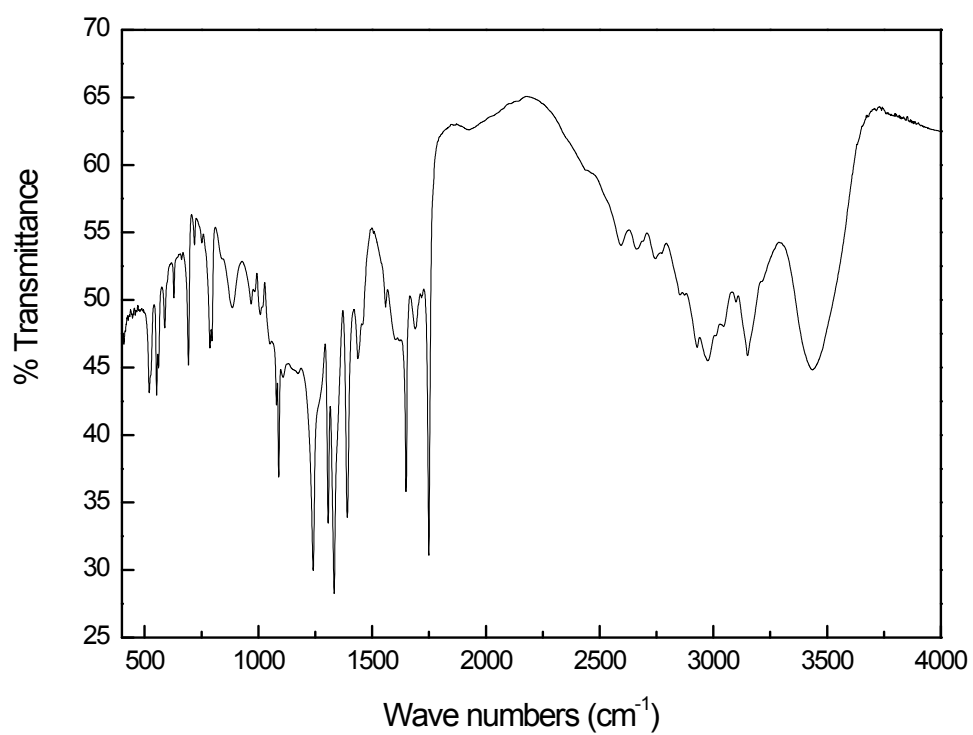

The IR curve of **5**

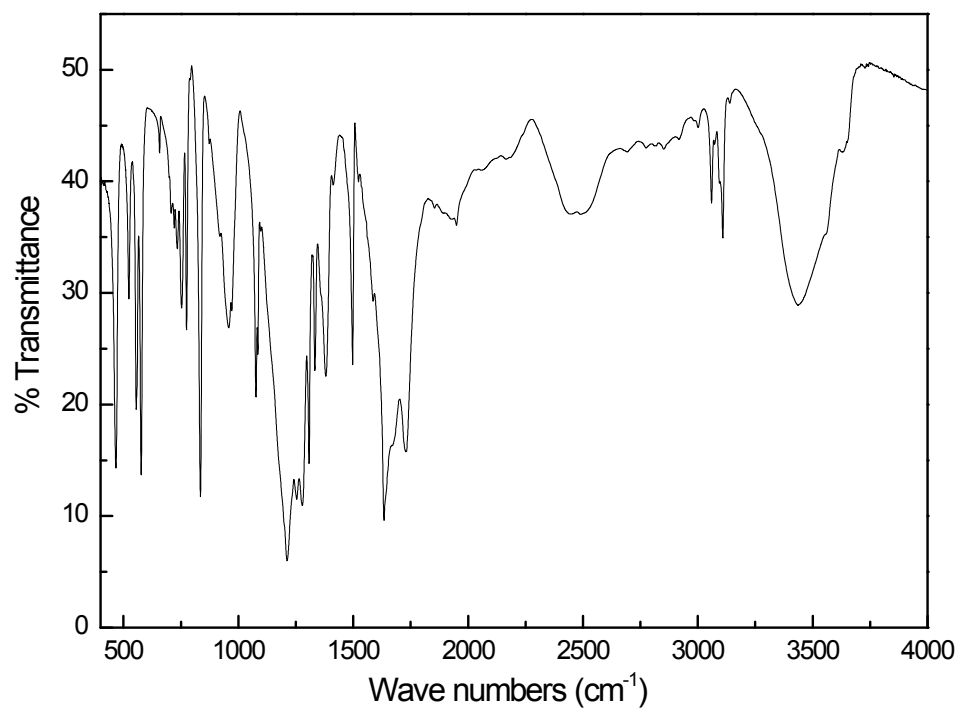

The IR curve of **6**

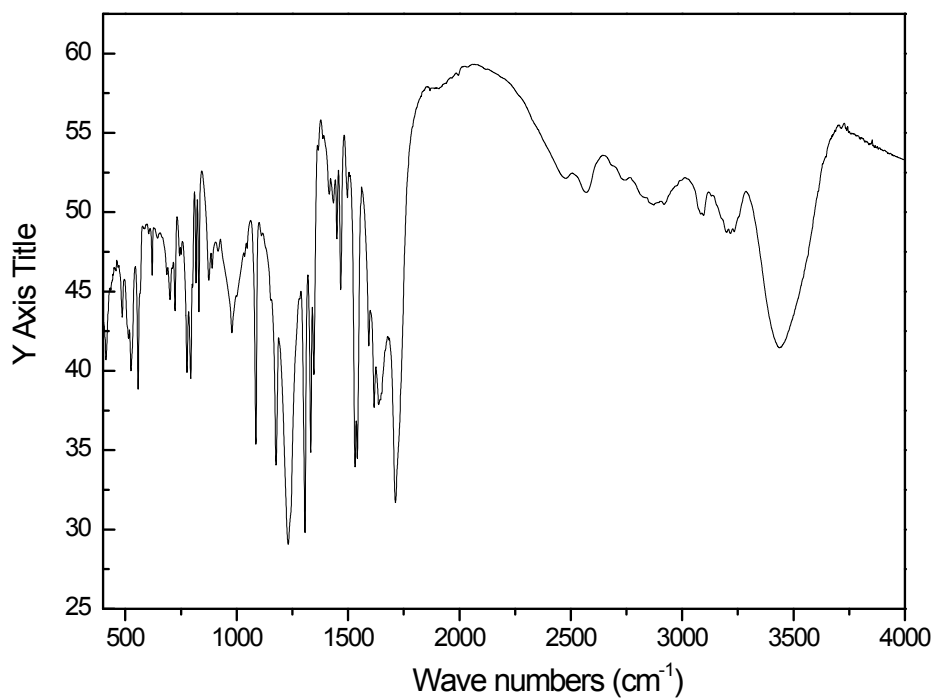

The IR curve of **7**



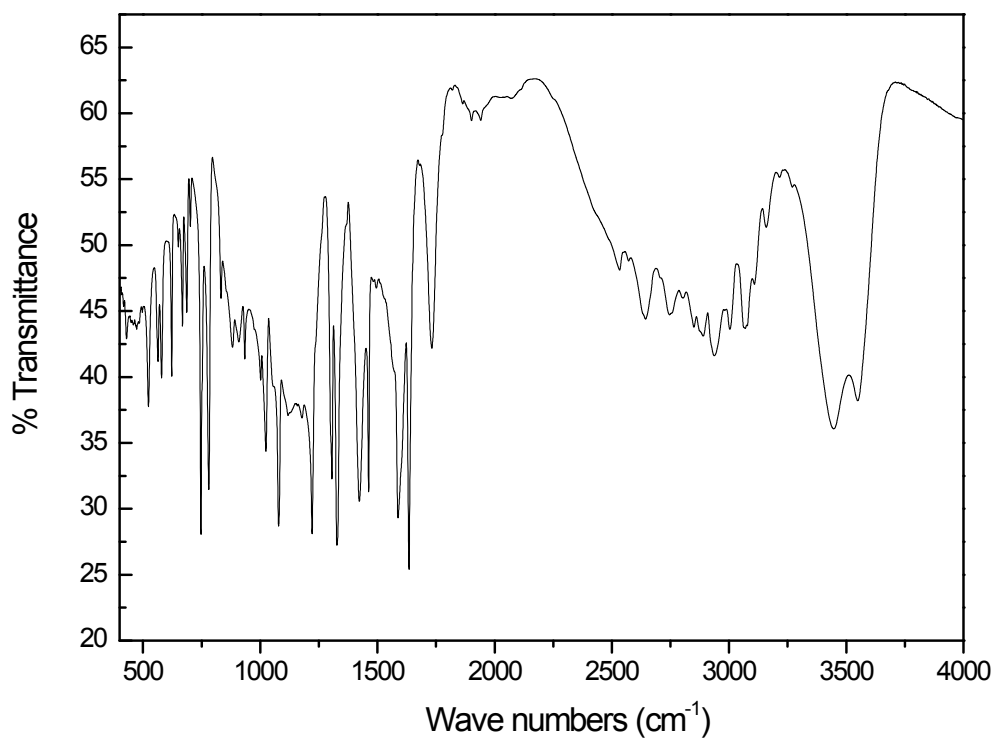

The IR curve of **8**

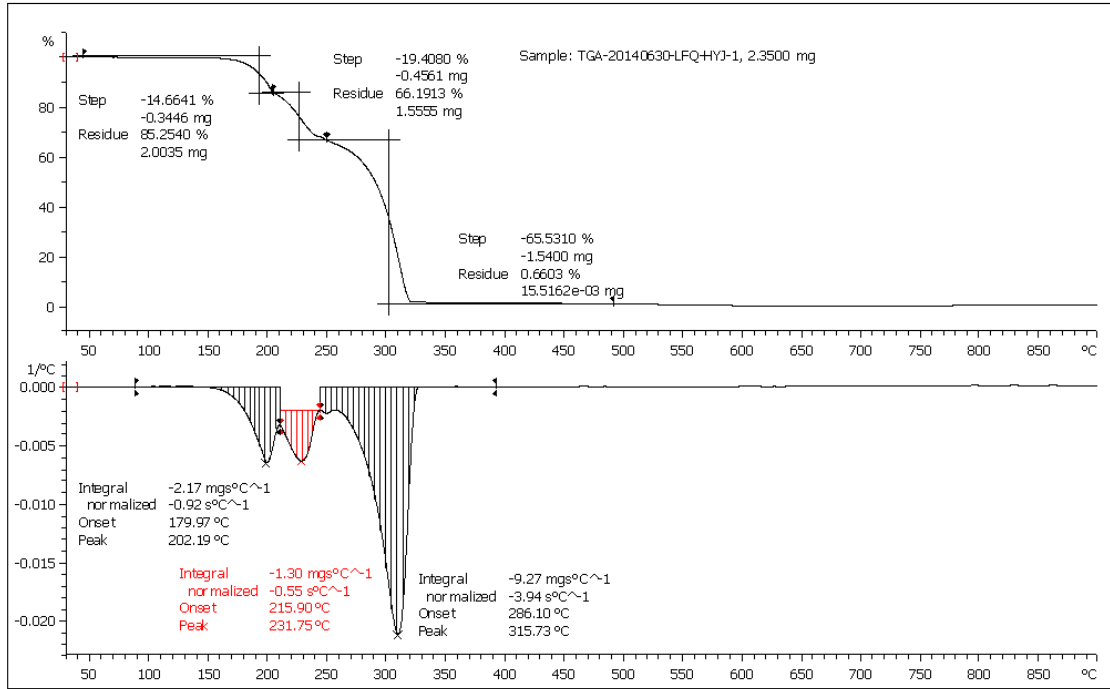

DEMO Version

STAR<sup>®</sup> SW 11.00

The TGA and DSC for 1

exo

TGA-201 40630-LFQ-HYJ-2

02.07.2014 15:51:00

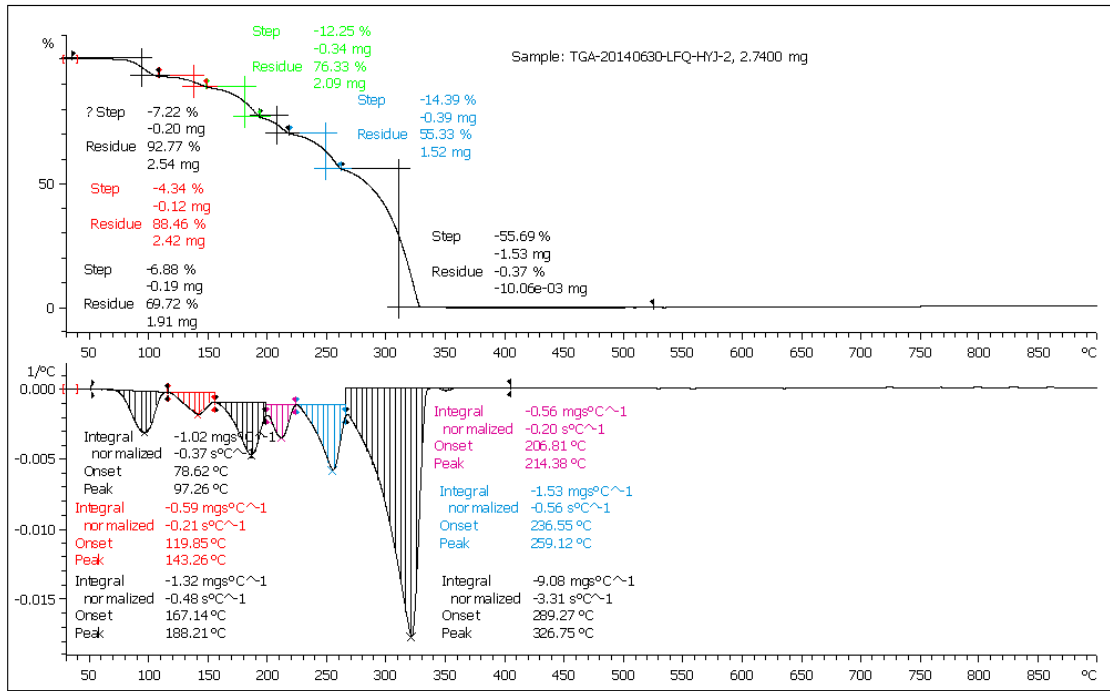

The TGA and DSC for 2

exo

TGA-201 40630-LFQ-HYJ-3

02.07.2014 15:47:10

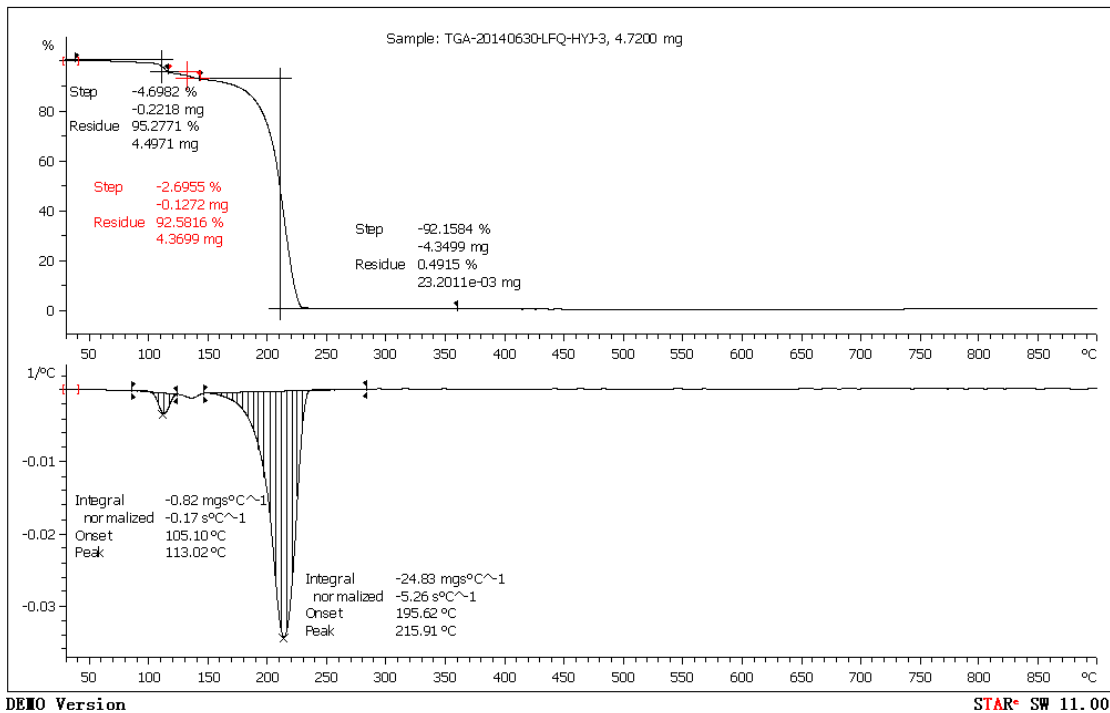

The TGA and DSC for 3

exo

TGA-201 40630-LFQ-HYJ-4

02.07.2014 15:45:27

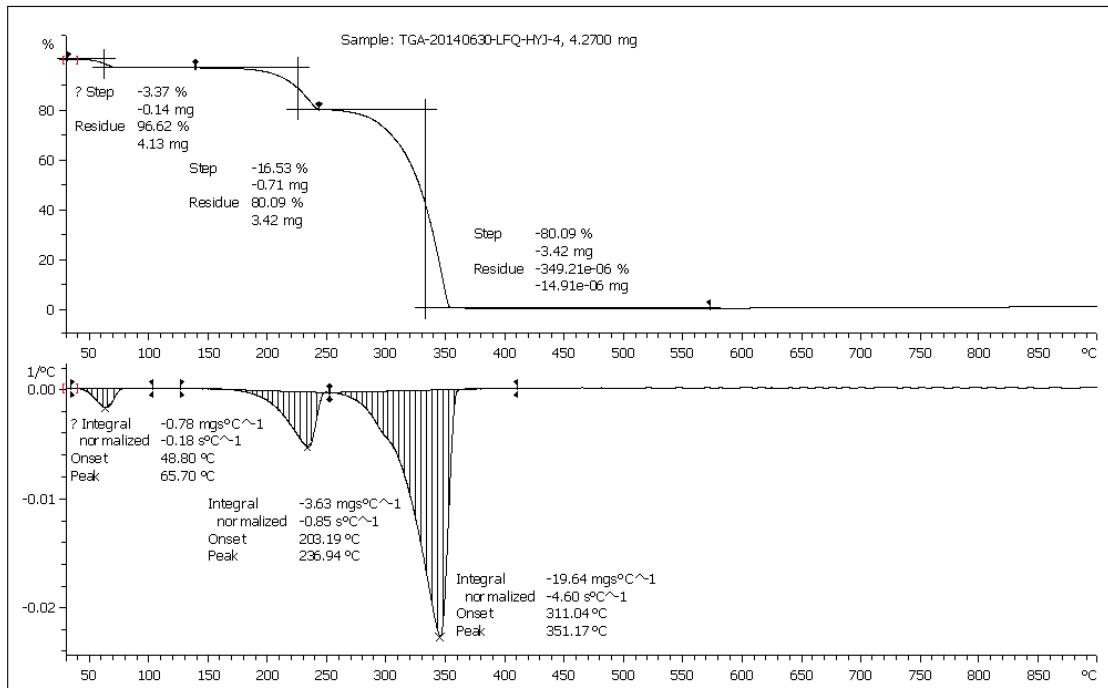

DEMO Version

STAR<sup>®</sup> SW 11.00

The TGA and DSC for 4

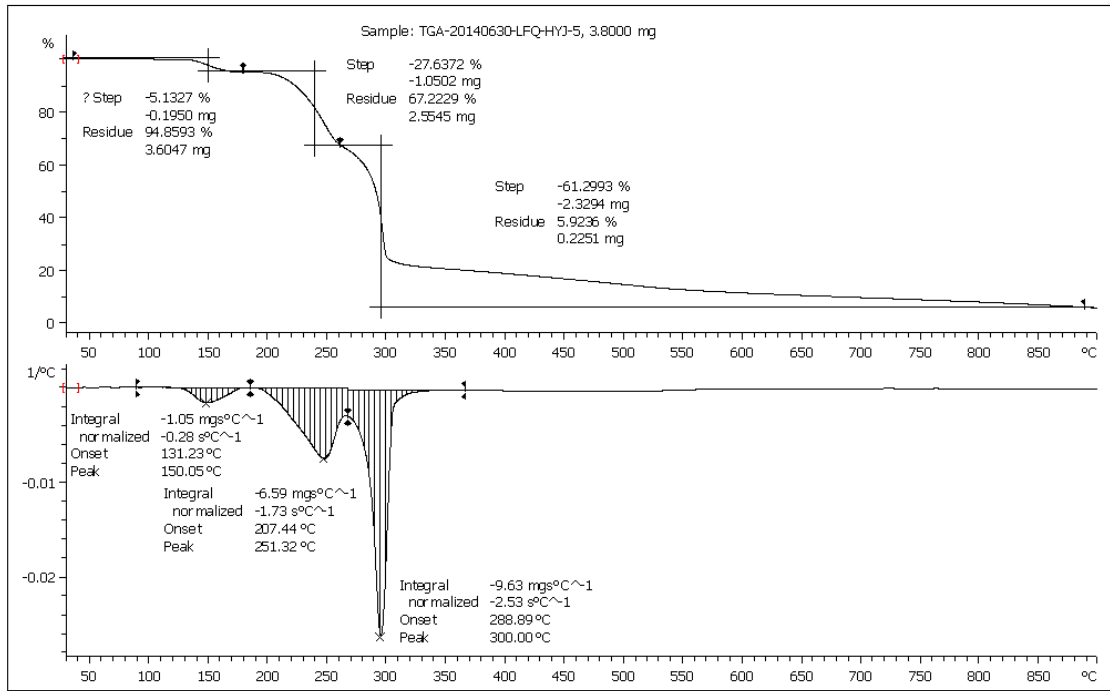

DEMO Version

STAR SW 11.00

The TGA and DSC for 5

exo

TGA-20140630-LFQ-HYJ-6

02.07.2014 15:22:50

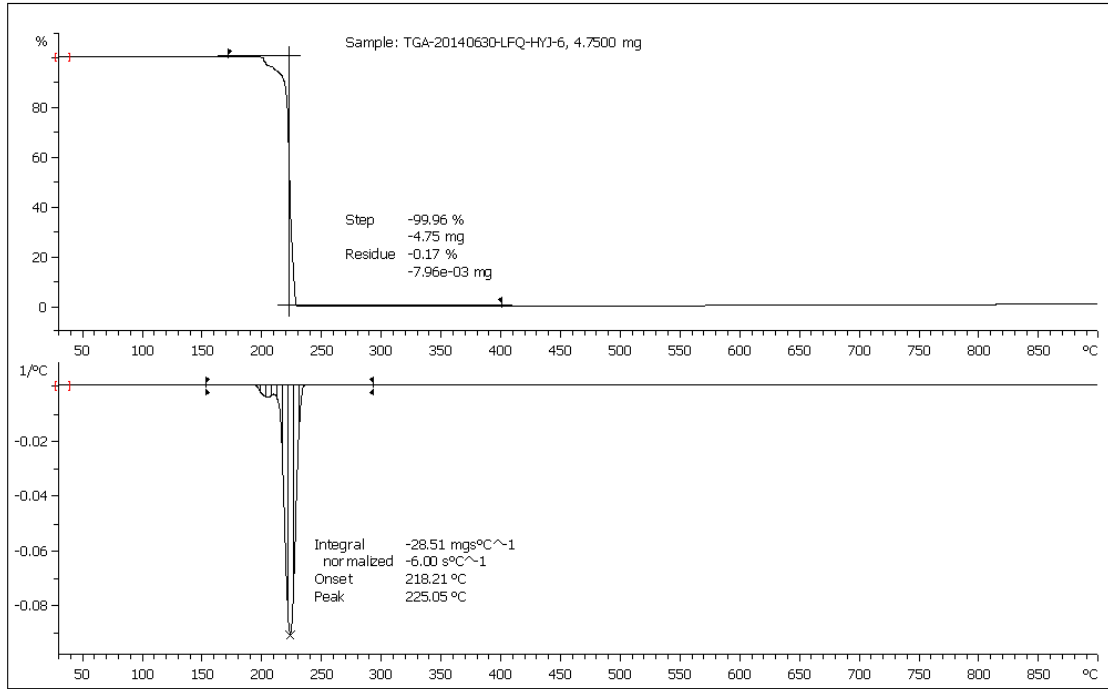

DEMO Version

STAR<sup>®</sup> SW 11.00

The TGA and DSC for 6

exo

TGA-20140630-LFQ-HYJ-7

02.07.2014 15:21:55

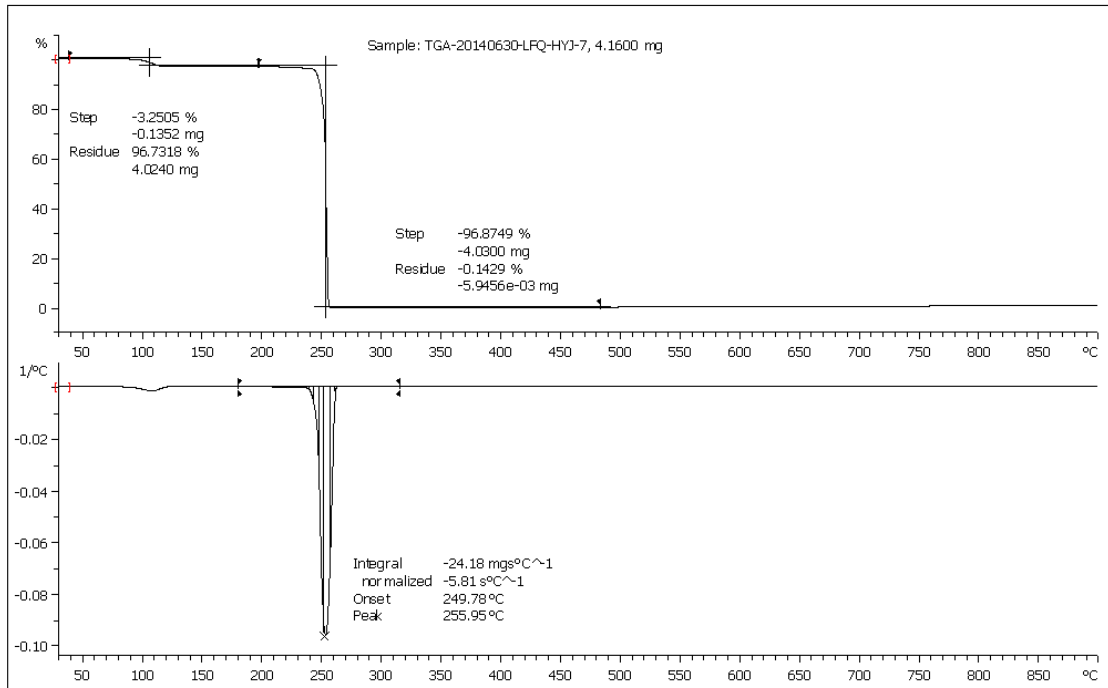

DEMO Version

STAR<sup>®</sup> SW 11.00

The TGA and DSC for 7

exo

TGA-20140630-LFQ-HYJ-8

02.07.2014 15:20:56

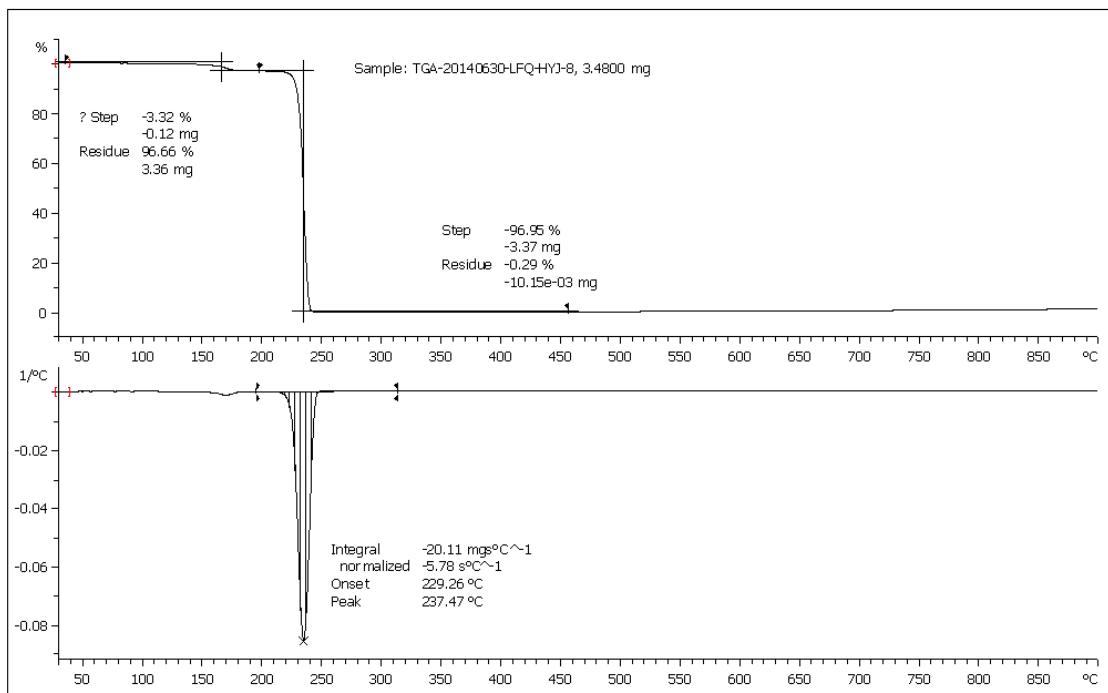

DEMO Version

STAR SW 11.00

The TGA and DSC for 8
